# Supplementary material
Source: publisher figshare collection journal article supplement (https://acs.figshare.com/ndownloader/files/3784507)
Supplement: Supplementary file 1 [file 3784507]

## Supporting Information

Synthesis procedures of MTC-catechol, transmittance at 600 nm of the uncoated and polymer-coated contact lenses, *F. solani* biofilm picture and protein adsorption on contact lenses.

**Scheme S1.** Synthesis procedures and chemical structure of MTC-catechol.

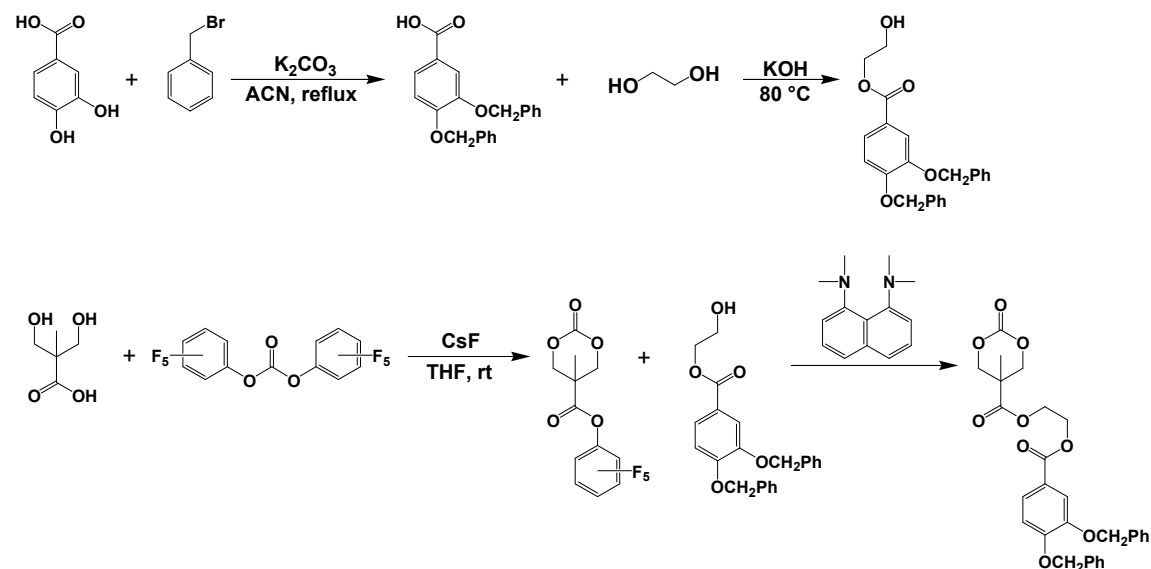

**Table S1.** Transmittance at 600 nm of the uncoated and polymer-coated contact lenses.

| Surface Coating  | Transmittance at 600 nm (mean $\pm$ SD) |
|------------------|-----------------------------------------|
| Pristine Control | 97.1 $\pm$ 0.1                          |
| AbPEI            | 96.8 $\pm$ 0.2                          |
| PEG-Catechol     | 95.5 $\pm$ 0.1                          |
| A                | 95.5 $\pm$ 0.1                          |
| B                | 95.1 $\pm$ 0.2                          |
| C                | 97.0 $\pm$ 0.1                          |
| D                | 96.0 $\pm$ 0.2                          |
| E                | 96.3 $\pm$ 0.1                          |
| F                | 95.3 $\pm$ 0.1                          |
| G                | 95.6 $\pm$ 0.1                          |
| H                | 96.6 $\pm$ 0.1                          |

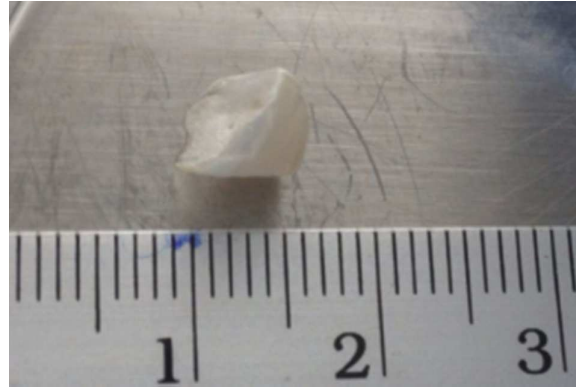

**Figure S1.** *F. solani* biofilm formed on the contact lens surface, which had a thickness of about 5 mm.

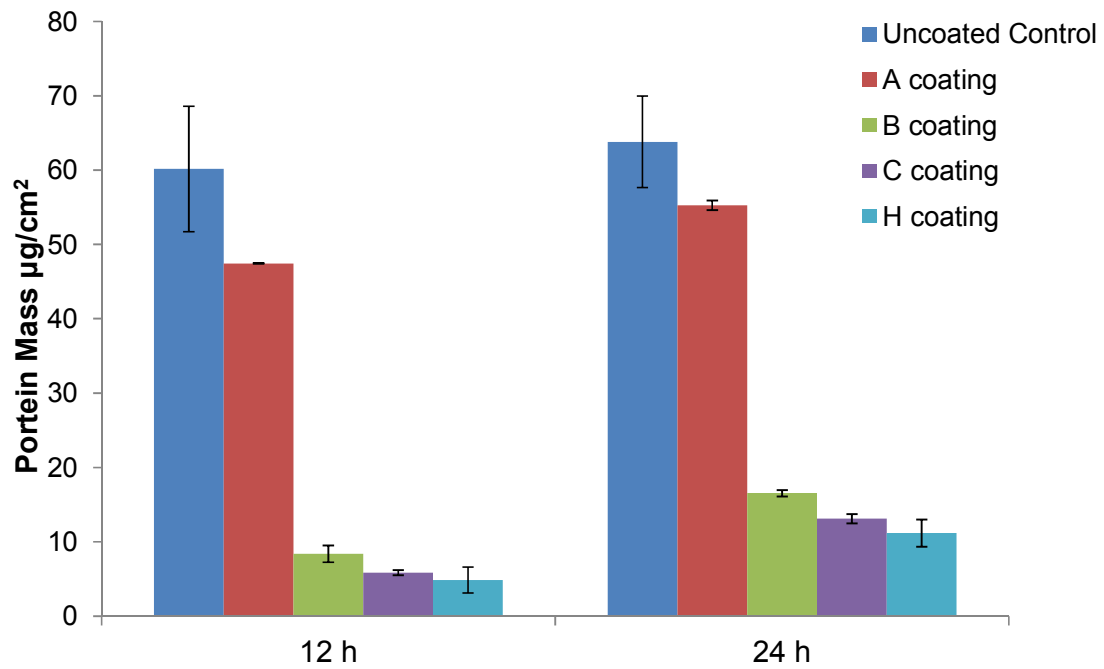

**Figure S2.** Evaluation of bovine serum albumin (BSA) adsorption on uncoated control lens and lens coated with polymers A, B, C and H by Micro BCA protein assay. Each condition was done in triplicates.  $**p < 0.005$ .
